# Supplementary material for: NANOG prion-like assembly mediates DNA bridging to facilitate chromatin reorganization and activation of pluripotency
Source: PubMed Central journal article supplement (PMC9106587; doi:10.1038/s41556-022-00896-x), 2022-04-28
Supplement: 41556_2022_896_MOESM10_ESM.pdf [file 41556_2022_896_MOESM10_ESM.pdf]

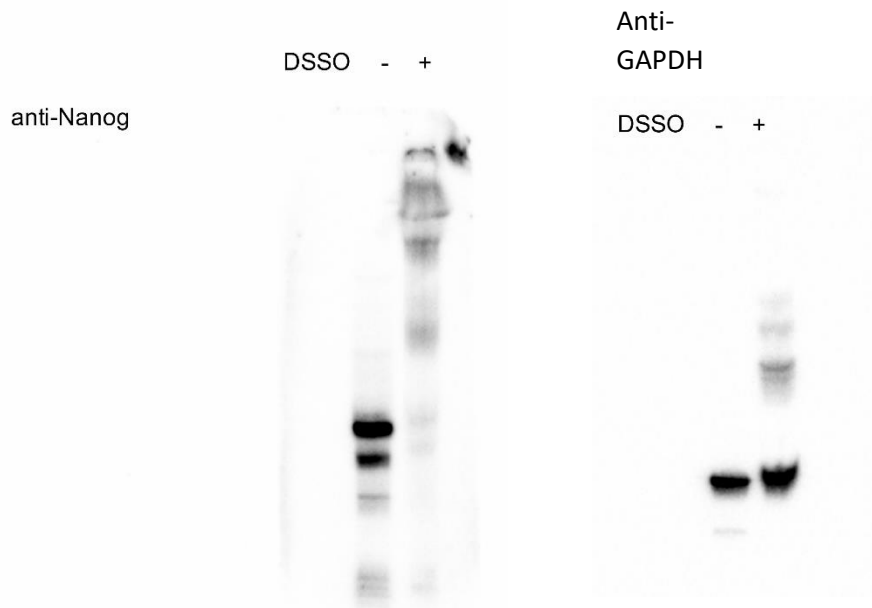

**Figure 3a.** Left gel corresponds to top figure in paper. Right gel corresponds to bottom figure in paper.

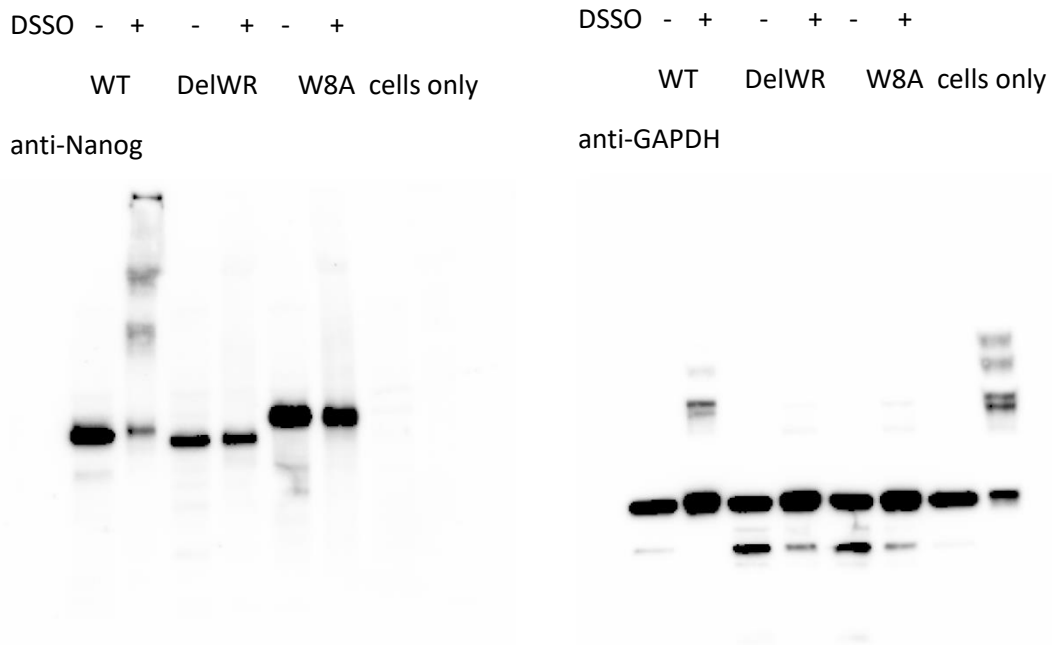

**Figure 3b.** Left gel corresponds to Lanes 1-7 top figure in paper. Right gel corresponds to Lanes 1-7 bottom figure in paper.

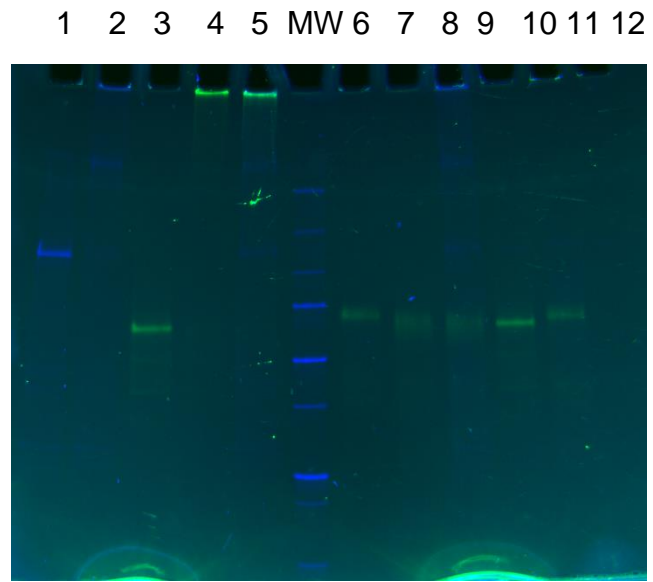

**Figure 3e.** Lanes 3-4 for WT and lanes -7 for W8A DSSO crosslinking in paper.
