# Supplementary material for: NANOG prion-like assembly mediates DNA bridging to facilitate chromatin reorganization and activation of pluripotency
Source: PubMed Central journal article supplement (PMC9106587; doi:10.1038/s41556-022-00896-x), 2022-04-28
Supplement: 41556_2022_896_MOESM18_ESM.pdf [file 41556_2022_896_MOESM18_ESM.pdf]

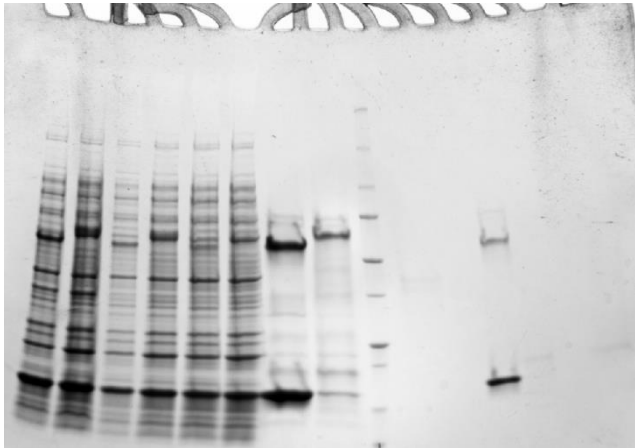

**Extended Data Fig. 2a.** Lanes 1-10 correspond to same lanes in paper.

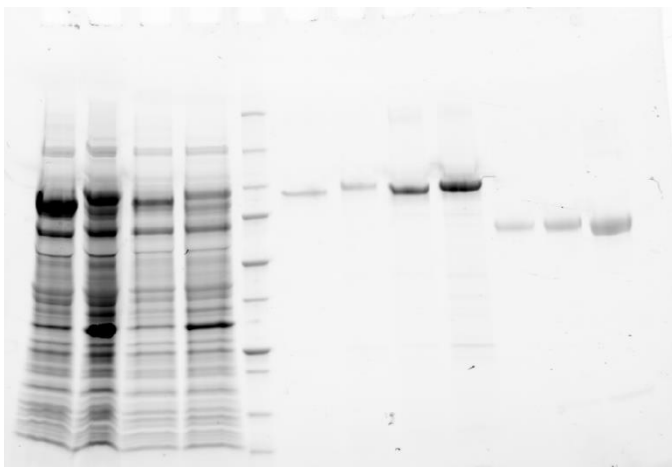

**Extended Data Fig. 2b.** Exact gel as in paper.

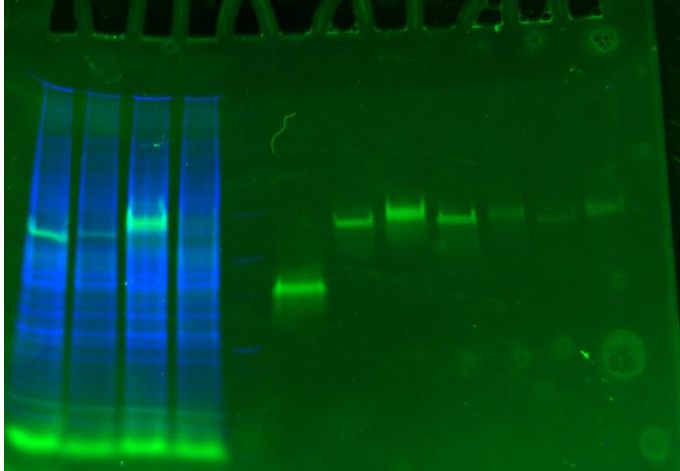

**Extended Data Fig. 2c.** Lanes 1-8 correspond to gel in paper.

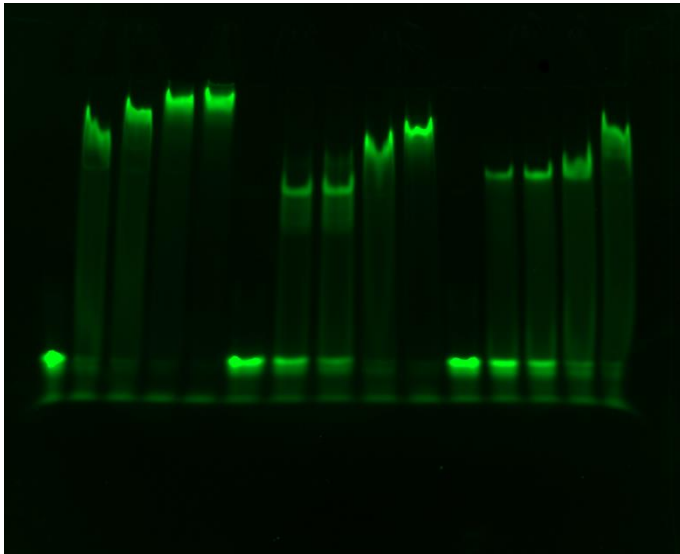

**Extended Data Fig. 2d.** Lanes 11-15 correspond to gel in paper.

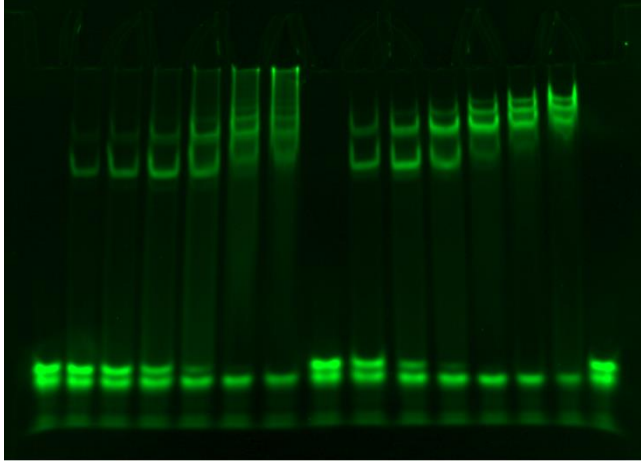

**Extended Data Fig. 2e.** Lanes 1-7 correspond to gel in paper.

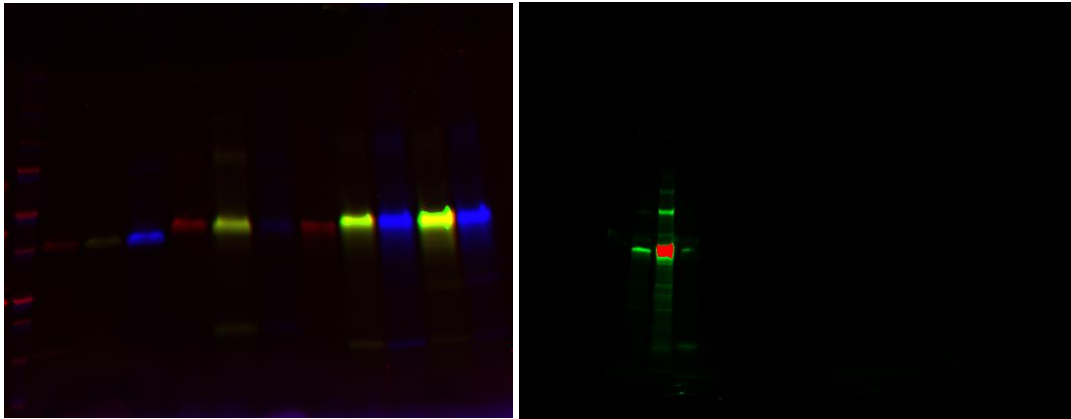

**Extended Data Fig. 2f.** Lanes 1-4,6 of left gel same correspond to lanes 1-4,5 in paper. Lane 1 of right gel correspond to lane 6 in paper.
