# Supplementary material for: NANOG prion-like assembly mediates DNA bridging to facilitate chromatin reorganization and activation of pluripotency
Source: PubMed Central journal article supplement (PMC9106587; doi:10.1038/s41556-022-00896-x), 2022-04-28
Supplement: 41556_2022_896_MOESM19_ESM.pdf [file 41556_2022_896_MOESM19_ESM.pdf]

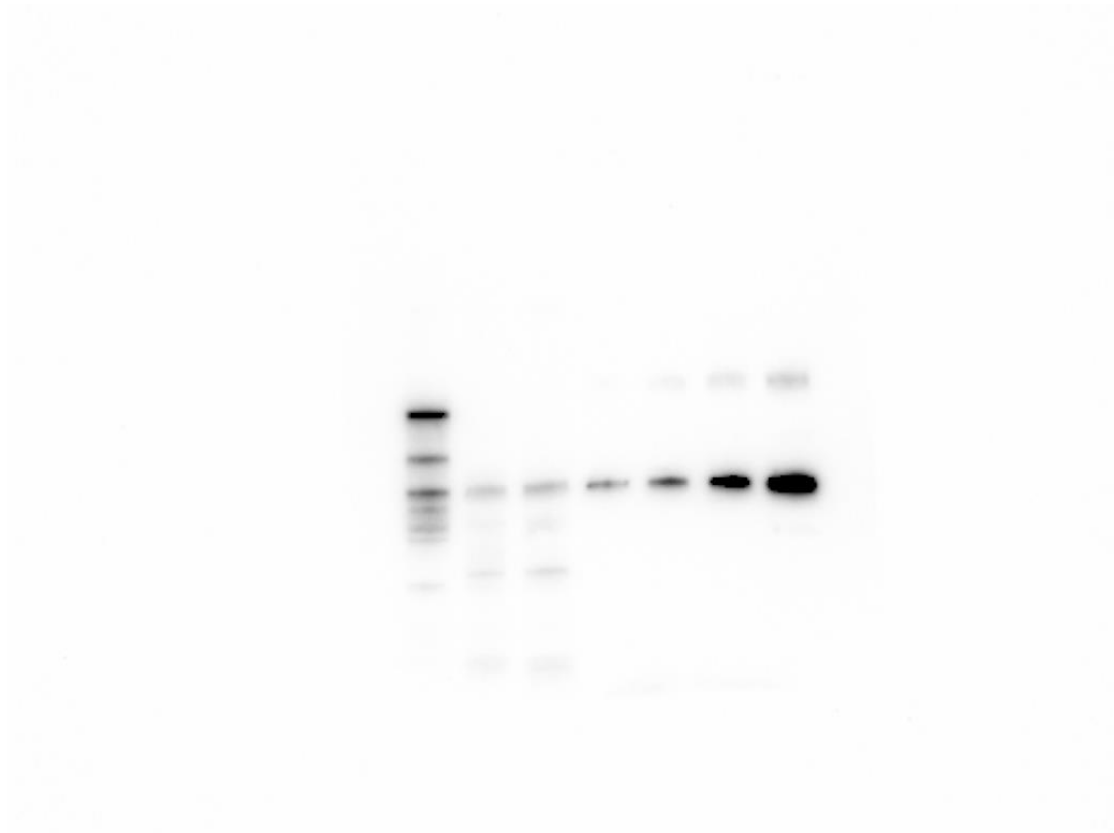

**Extended Data Fig. 4e.** Exact gel as in paper.
