# Supplementary material for: NANOG prion-like assembly mediates DNA bridging to facilitate chromatin reorganization and activation of pluripotency
Source: PubMed Central journal article supplement (PMC9106587; doi:10.1038/s41556-022-00896-x), 2022-04-28
Supplement: 41556_2022_896_MOESM20_ESM.pdf [file 41556_2022_896_MOESM20_ESM.pdf]

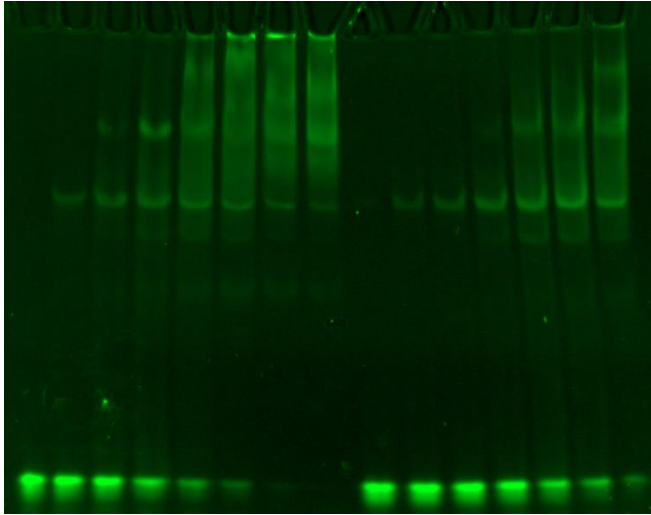

**Extended Data Fig. 5a.** Exact gel image in paper.

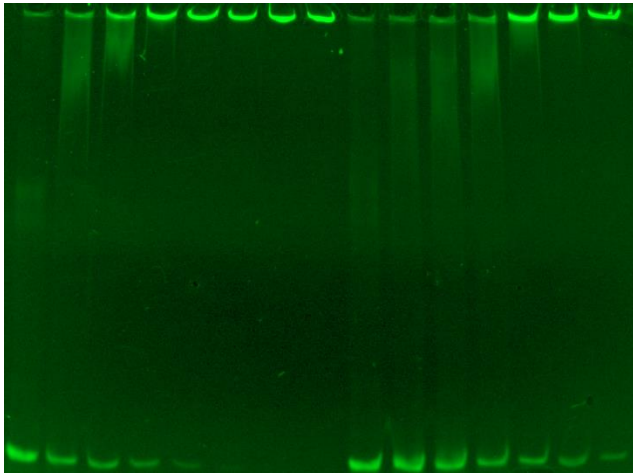

**Extended Data Fig. 5b.** Exact gel image in paper.

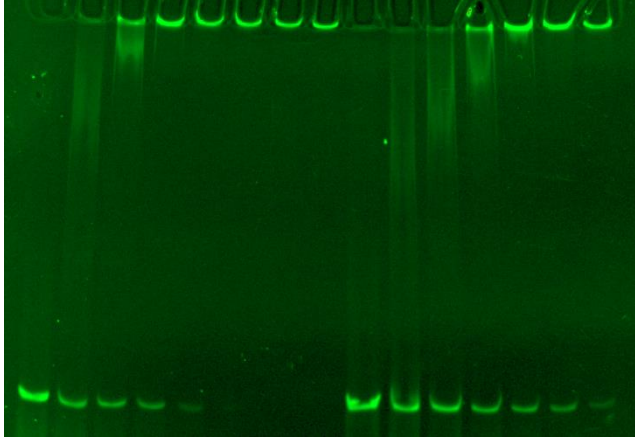

**Extended Data Fig. 5c.** Exact gel image in paper

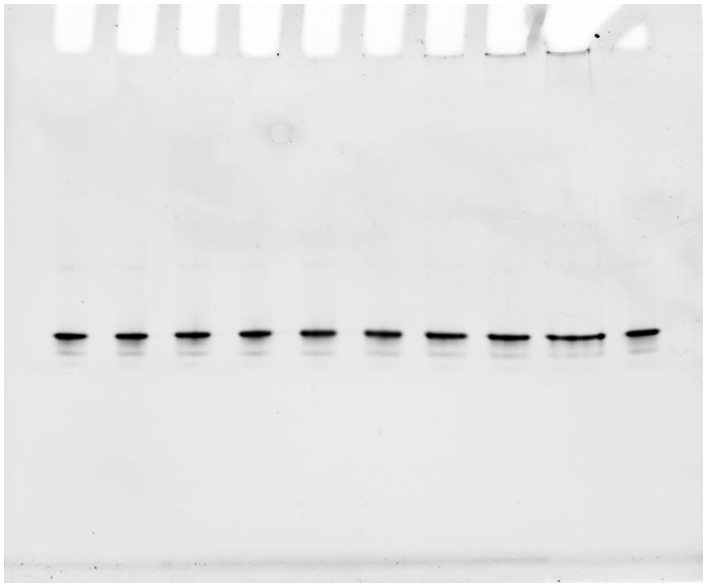

**Extended Data Fig. 5d.** Lanes 1-9 correspond to gel in paper.
